# Supplementary figures and images for: Responses of Soil Abiotic Properties and Microbial Community Structure to 25-Year Cucumber Monoculture in Commercial Greenhouses
Source: MDPI journal article supplement (doi:10.3390/agriculture11040341), 2021-04-11

**(A)**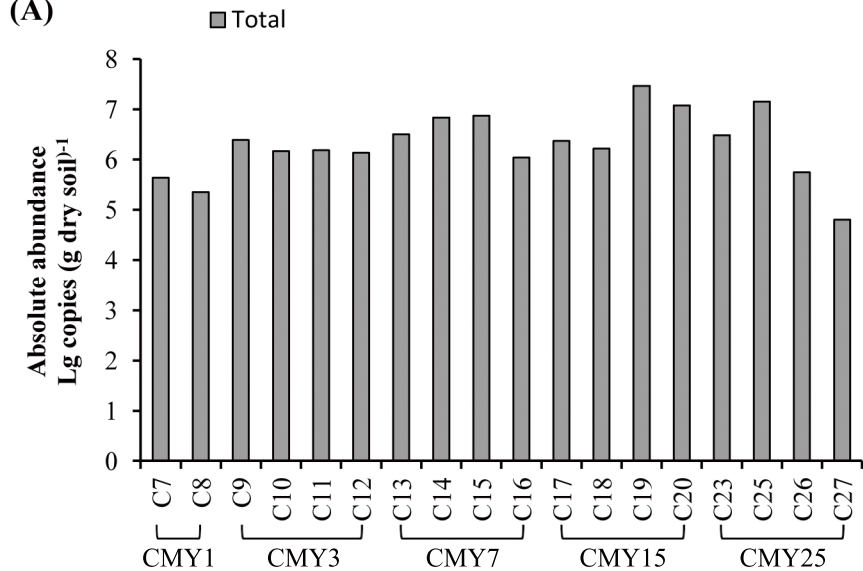**(B)**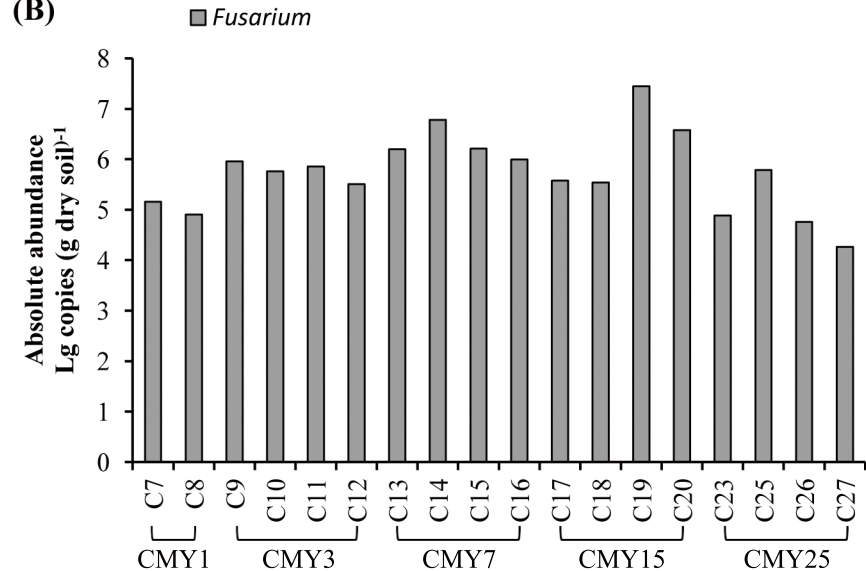

Supplement: s1 [file s1]
